# Supplementary material for: To shift, or not to shift: adequate selection of an internal standard in mass-shift approaches using tandem ICP-mass spectrometry (ICP-MS/MS)
Source: Royal Society of Chemistry journal article supplement (doi:10.1039/d0ja00438c), 2021-01-01
Supplement: d0ja00438c1.pdf [file d0ja00438c1.pdf]

## Electronic supplementary information (ESI)

### To shift, or not to shift: adequate selection of an internal standard in mass-shift approaches using tandem ICP-mass spectrometry (ICP-MS/MS)

Eduardo Bolea-Fernandez<sup>a</sup>, Ana Rua-Ibarz<sup>a</sup>, Martín Resano<sup>b</sup>, Frank Vanhaecke<sup>a\*</sup>

<sup>a</sup>Ghent University, Department of Chemistry, Atomic & Mass Spectrometry – A&MS research group, Campus Sterre, Krijgslaan 281-S12, 9000 Ghent, Belgium

<sup>b</sup>University of Zaragoza, Aragón Institute of Engineering Research (I3A), Department of Analytical Chemistry, Pedro Cerbuna 12, 50009 Zaragoza, Spain

\*Corresponding author: [Frank.Vanhaecke@UGent.be](mailto:Frank.Vanhaecke@UGent.be) – Tel:+3292644848

#### **Table of contents:**

1. Figure S1. Evaluation of the short-term signal drift for atomic ions monitored on-mass that react with NH<sub>3</sub>/He (green up-pointing triangles), atomic ions monitored on-mass that do not react (or showed limited reactivity) with NH<sub>3</sub>/He (grey down-pointing triangles), reaction product ions (mass-shift – red diamonds), and atomic ions monitored on-mass in vented mode (blue circles). In this experiment, the instrument was not previously stabilized with the NH<sub>3</sub>/He gas mixture. Uncertainties are expressed as the standard deviation of 8, 5, 12 and 13 relative signal intensities for atomic ions monitored on-mass that react with NH<sub>3</sub>/He, atomic ions monitored on-mass that do not react with NH<sub>3</sub>/He, reaction product ions, and atomic ions monitored in vented mode, respectively.
2. Figure S2. Short-term signal stability/drift for atomic ions and their corresponding optimum reaction product ions at 1.0 mL min<sup>-1</sup> of NH<sub>3</sub>/He (A) and at 3.0 mL min<sup>-1</sup> of NH<sub>3</sub>/He (B) for Sc, Ti, Ge, Y and Ce. In this experiment, the instrument was not previously stabilized with the NH<sub>3</sub>/He gas mixture.

3. Figure S3. Evaluation of the long-term signal drift for atomic ions monitored on-mass (black squares) in  $\text{NH}_3/\text{He}$  mode, reaction product ions (mass-shift approach – red diamonds) and atomic ions monitored in vented mode (blue circles) using ICP-MS/MS. In this experiment, the instrument was drift-stabilized by running it for 4 hours with the cell pressurized with  $\text{NH}_3/\text{He}$  ( $3.0 \text{ mL min}^{-1}$ ) prior to signal monitoring. Uncertainties are expressed as the standard deviation of 13 and 12 relative signal intensities for atomic (both pressurized and vented modes) and reaction product ions, respectively.
4. Figure S4. Relative intensities for all nuclides measured as atomic or reaction product ion under different instrument settings. The relative intensities were normalized relative to those obtained under optimum conditions (see Table 1). Uncertainties are expressed as the standard deviation of 5 measurement replicates.
5. Figure S5. Scree plot of coefficients obtained after hierarchical cluster analysis by stage (the red dotted line represents the stop of the cluster analysis).
6. Table S1. Best suited reaction product ion under compromise conditions for multi-element determination ( $3.0 \text{ mL min}^{-1}$  of  $\text{NH}_3/\text{He}$ ) and the reaction product ion providing the highest signal intensity and the corresponding gas flow rate for all of the target elements.
7. Table S2. ICP-MS/MS data acquisition parameters for a multi-tune method (no gas,  $3.0 \text{ mL min}^{-1}$   $\text{NH}_3/\text{He}$ ).
8. Table S3. ICP-MS/MS data acquisition parameters for a multi-tune method ( $1.0$ ,  $3.0$  and  $5.0 \text{ mL min}^{-1}$   $\text{NH}_3/\text{He}$ ).

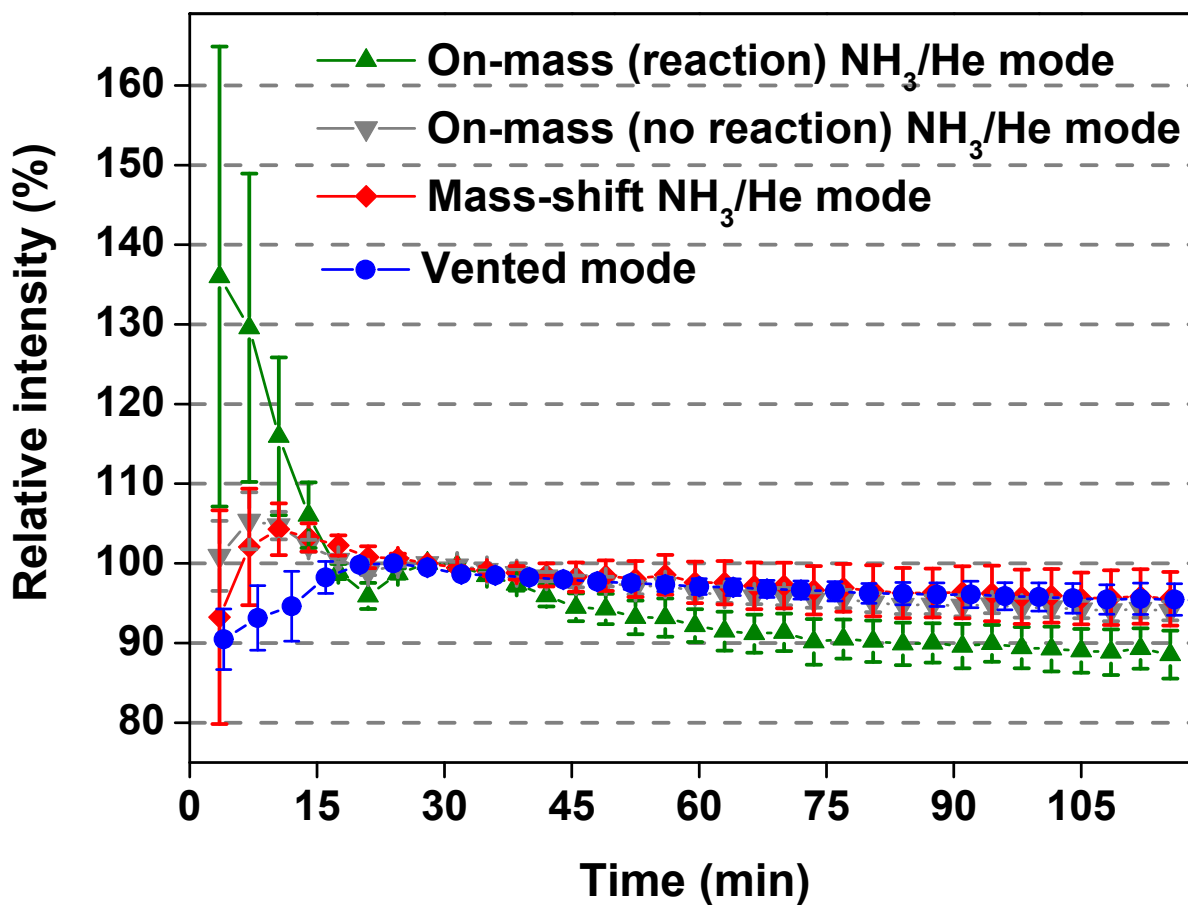

**Figure S1.** Evaluation of the long-term signal drift for atomic ions monitored on-mass (black squares) in NH<sub>3</sub>/He mode, reaction product ions (mass-shift approach – red diamonds) and atomic ions monitored in vented mode (blue circles) using ICP-MS/MS. In this experiment, the instrument was drift-stabilized by running it for 4 hours with the cell pressurized with NH<sub>3</sub>/He (3.0 mL min<sup>-1</sup>) prior to signal monitoring. Uncertainties are expressed as the standard deviation of 13 and 12 relative signal intensities for atomic (both pressurized and vented modes) and reaction product ions, respectively.

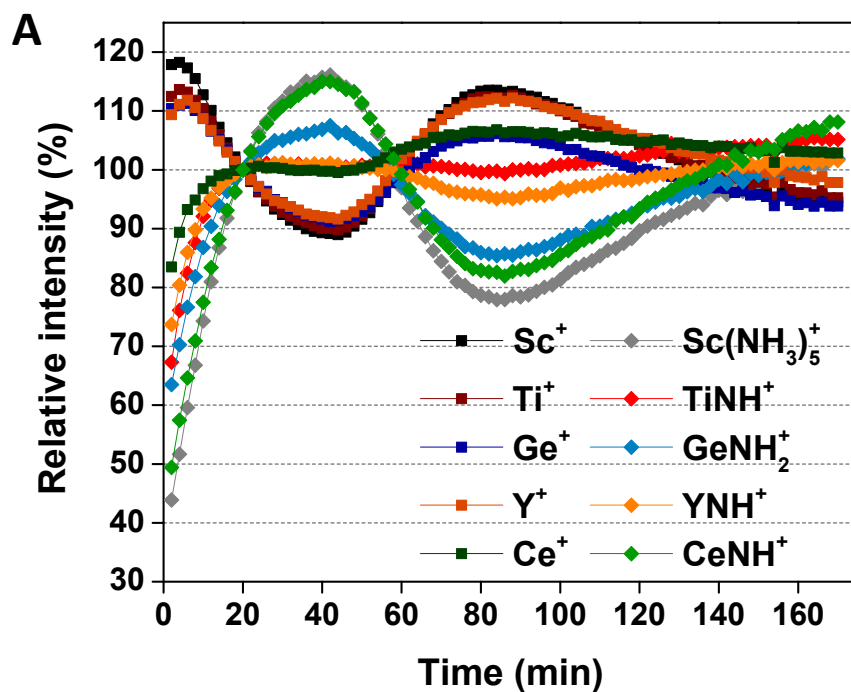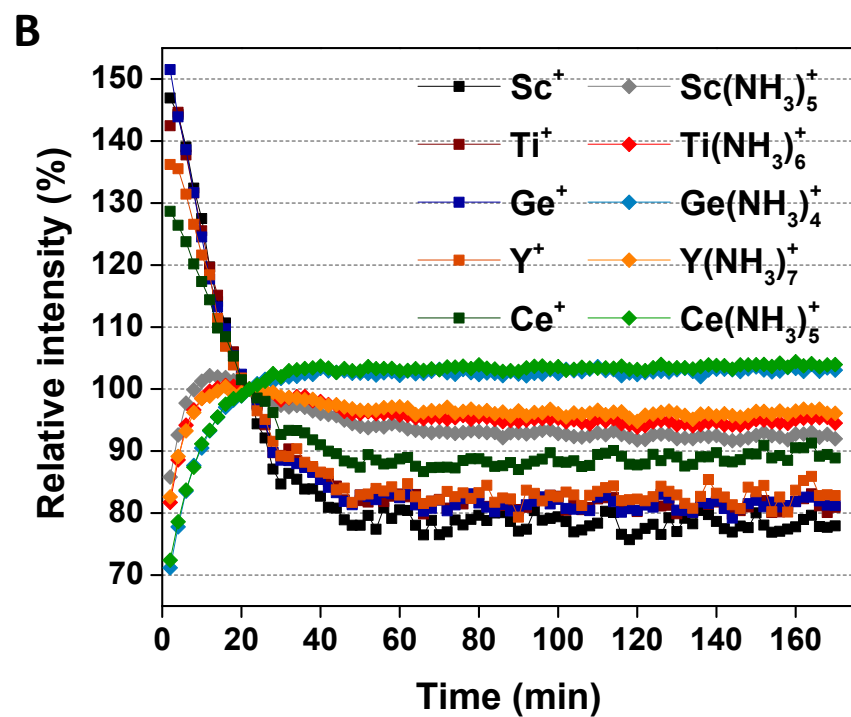

**Figure S2.** Short-term signal stability/drift for atomic ions and their corresponding optimum reaction product ions at 1.0 mL min<sup>-1</sup> of NH<sub>3</sub>/He (A) and at 3.0 mL min<sup>-1</sup> of NH<sub>3</sub>/He (B) for Sc, Ti, Ge, Y and Ce. In this experiment, the instrument was not previously stabilized with the NH<sub>3</sub>/He gas mixture.

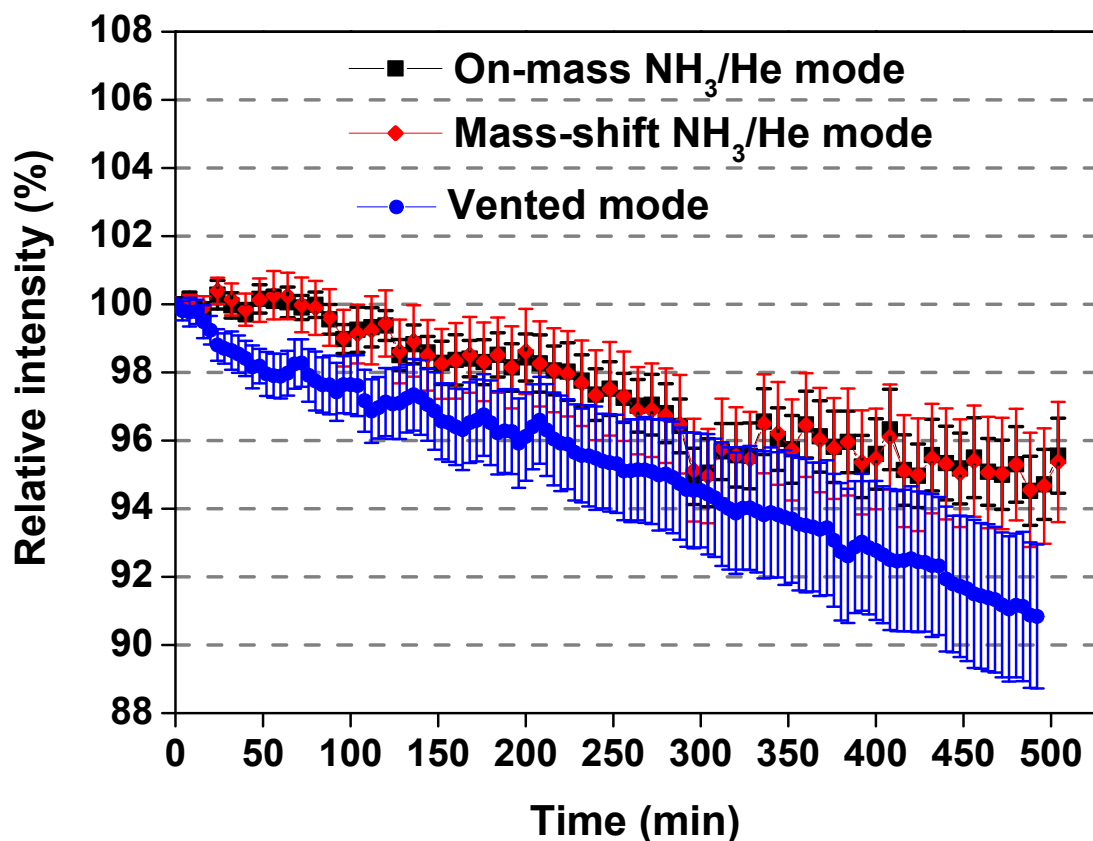

**Figure S3.** Evaluation of the long-term signal drift for atomic ions monitored on-mass (black squares) in NH<sub>3</sub>/He mode, reaction product ions (mass-shift approach – red diamonds) and atomic ions monitored in vented mode (blue circles) using ICP-MS/MS. In this experiment, the instrument was drift-stabilized by running it for 4 hours with the cell pressurized with NH<sub>3</sub>/He (3.0 mL min<sup>-1</sup>) prior to signal monitoring. Uncertainties are expressed as the standard deviation of 13 and 12 relative signal intensities for atomic (both pressurized and vented modes) and reaction product ions, respectively.

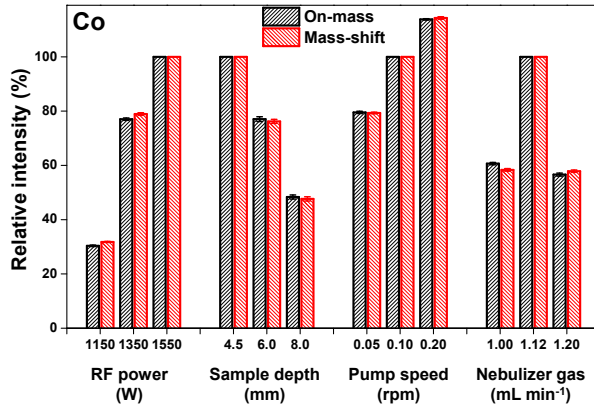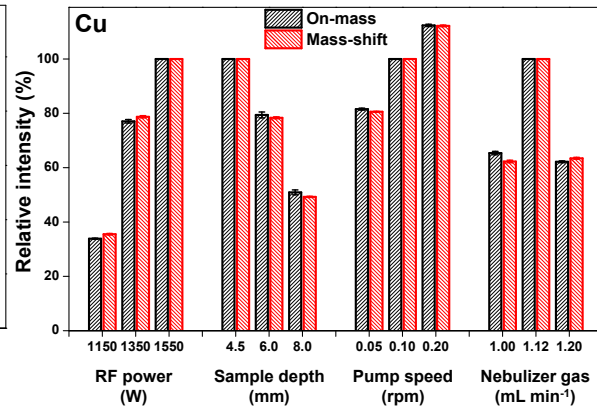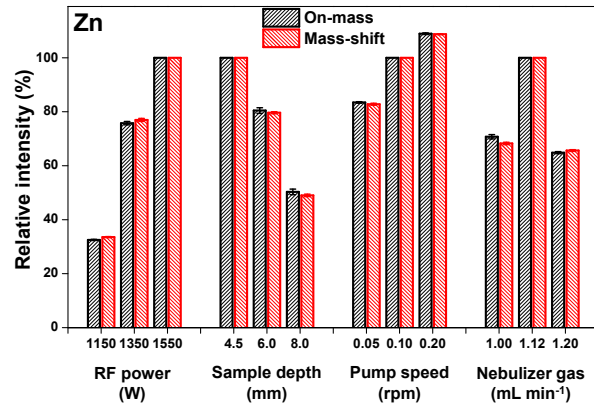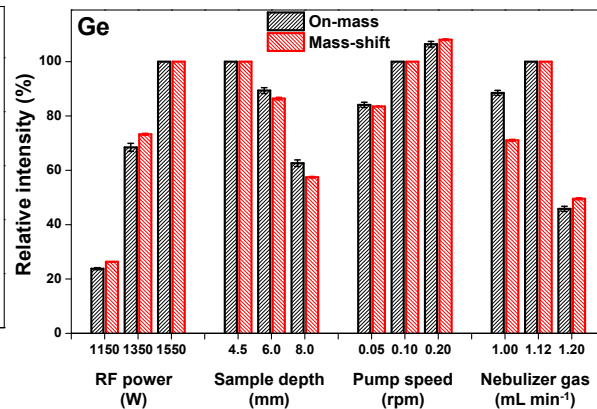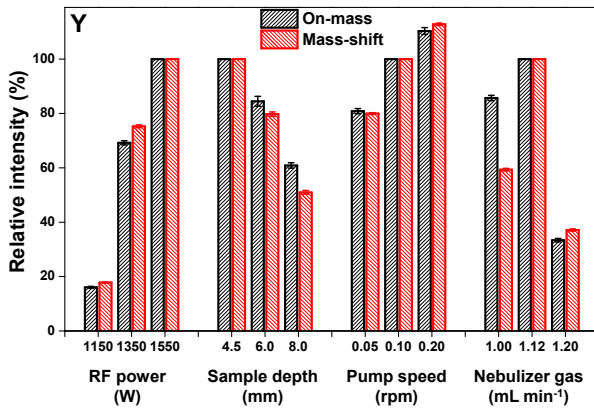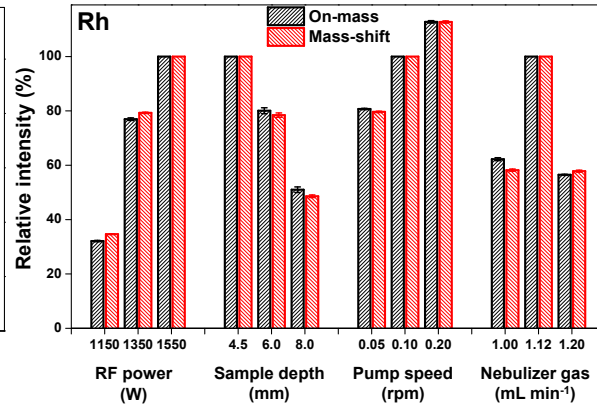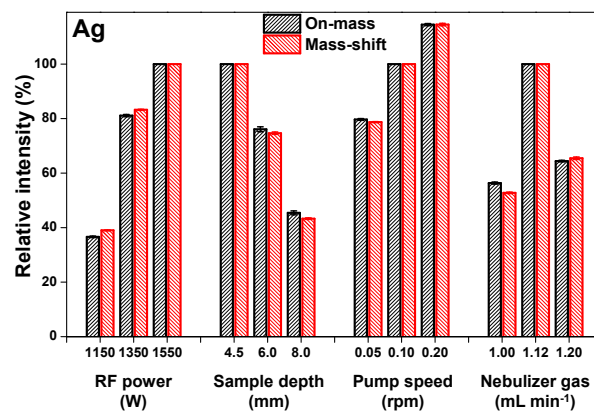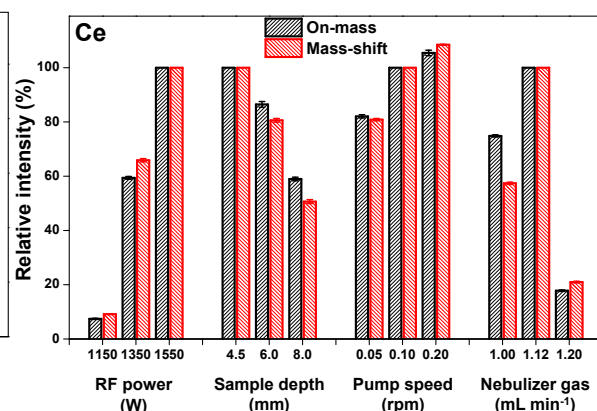

**Figure S4.** Relative intensities for all nuclides measured as atomic or reaction product ion under different instrument settings. The relative intensities were normalized relative to those obtained under optimum conditions (see Table 1). Uncertainties are expressed as the standard deviation of 5 measurement replicates.

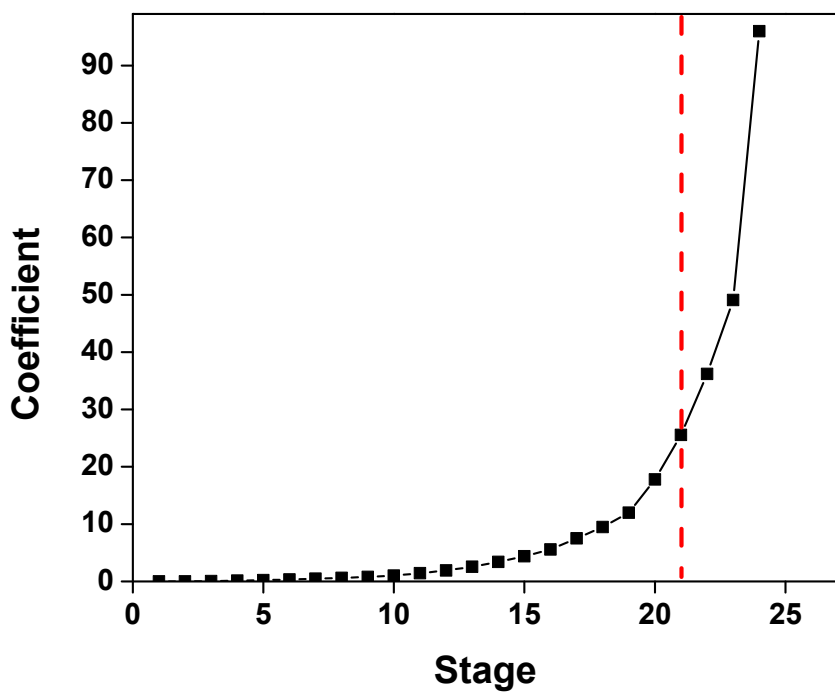

**Figure S5.** Scree plot of coefficients obtained after hierarchical cluster analysis by stage (the red dotted line represents the stop of the cluster analysis).

**Table S1.** Best suited reaction product ion under compromise conditions for multi-element determination (3.0 mL min<sup>-1</sup> of NH<sub>3</sub>/He) and the reaction product ion providing the highest signal intensity and the corresponding gas flow rate for all of the target elements.

| Nuclide           | Gas flow rate<br>(mL min <sup>-1</sup> ) | Q2  | Reaction product<br>ion                        | Intensity<br>(cps L μg <sup>-1</sup> ) |
|-------------------|------------------------------------------|-----|------------------------------------------------|----------------------------------------|
| <sup>24</sup> Mg  | 3.0                                      | 75  | Mg(NH <sub>3</sub> ) <sub>3</sub> <sup>+</sup> | 1000                                   |
| <sup>45</sup> Sc  | 1.0                                      | 130 | Sc(NH <sub>3</sub> ) <sub>5</sub> <sup>+</sup> | 25000                                  |
|                   | 3.0                                      |     |                                                | 12000                                  |
| <sup>48</sup> Ti  | 1.0                                      | 63  | TiNH <sup>+</sup>                              | 29000                                  |
|                   | 3.0                                      |     |                                                | 150                                    |
| <sup>56</sup> Fe  | 3.0                                      | 90  | Fe(NH <sub>3</sub> ) <sub>2</sub> <sup>+</sup> | 38000                                  |
| <sup>59</sup> Co  | 2.0                                      | 93  | Co(NH <sub>3</sub> ) <sub>2</sub> <sup>+</sup> | 47000                                  |
|                   | 3.0                                      |     |                                                | 36000                                  |
| <sup>65</sup> Cu  | 3.0                                      | 99  | Cu(NH <sub>3</sub> ) <sub>2</sub> <sup>+</sup> | 38000                                  |
| <sup>66</sup> Zn  | 3.0                                      | 100 | Zn(NH <sub>3</sub> ) <sub>2</sub> <sup>+</sup> | 1800                                   |
| <sup>74</sup> Ge  | 1.0                                      | 90  | GeNH <sub>2</sub> <sup>+</sup>                 | 9100                                   |
|                   | 3.0                                      |     |                                                | 125                                    |
| <sup>89</sup> Y   | 1.0                                      | 104 | YNH <sup>+</sup>                               | 58000                                  |
|                   | 3.0                                      |     |                                                | 191                                    |
| <sup>103</sup> Rh | 4.0                                      | 171 | Rh(NH <sub>3</sub> ) <sub>4</sub> <sup>+</sup> | 67000                                  |
|                   | 3.0                                      |     |                                                | 63000                                  |
| <sup>107</sup> Ag | 4.0                                      | 141 | Ag(NH <sub>3</sub> ) <sub>2</sub> <sup>+</sup> | 9700                                   |
|                   | 3.0                                      |     |                                                | 7500                                   |
| <sup>140</sup> Ce | 1.0                                      | 155 | CeNH <sup>+</sup>                              | 34000                                  |
|                   | 3.0                                      |     |                                                | 225                                    |



**Table S2.** ICP-MS/MS data acquisition parameters for a multi-tune method (no gas, 3.0 mL min<sup>-1</sup> NH<sub>3</sub>/He).

| Element                               | No gas    |                    | 3.0 mL min <sup>-1</sup> NH <sub>3</sub> /He |                    |
|---------------------------------------|-----------|--------------------|----------------------------------------------|--------------------|
|                                       | Q1 → Q2   | Int. time/mass (s) | Q1 → Q2                                      | Int. time/mass (s) |
| Mg                                    | ---       | ---                | 24 → 75                                      | 1                  |
| Sc                                    | ---       | ---                | 45 → 130                                     | 1                  |
| Ti                                    | ---       | ---                | 48 → 150                                     | 1                  |
| Fe                                    | ---       | ---                | 56 → 90                                      | 1                  |
| Co                                    | ---       | ---                | 59 → 59                                      | 1                  |
| Co                                    | ---       | ---                | 59 → 93                                      | 1                  |
| Cu                                    | ---       | ---                | 65 → 65                                      | 1                  |
| Cu                                    | ---       | ---                | 65 → 99                                      | 1                  |
| Zn                                    | ---       | ---                | 66 → 66                                      | 1                  |
| Zn                                    | ---       | ---                | 66 → 100                                     | 1                  |
| Ga                                    | ---       | ---                | 71 → 71                                      | 1                  |
| Ge                                    | ---       | ---                | 74 → 74                                      | 1                  |
| Ge                                    | ---       | ---                | 74 → 125                                     | 1                  |
| Y                                     | ---       | ---                | 89 → 89                                      | 1                  |
| Y                                     | ---       | ---                | 89 → 191                                     | 1                  |
| Rh                                    | ---       | ---                | 103 → 103                                    | 1                  |
| Rh                                    | ---       | ---                | 103 → 171                                    | 1                  |
| Ag                                    | ---       | ---                | 107 → 107                                    | 1                  |
| Ag                                    | ---       | ---                | 107 → 141                                    | 1                  |
| Cd                                    | ---       | ---                | 111 → 111                                    | 1                  |
| In                                    | ---       | ---                | 115 → 115                                    | 1                  |
| Cs                                    | ---       | ---                | 133 → 133                                    | 1                  |
| Ce                                    | ---       | ---                | 140 → 140                                    | 1                  |
| Ce                                    | ---       | ---                | 140 → 225                                    | 1                  |
| Tl                                    | ---       | ---                | 205 → 205                                    | 1                  |
| U                                     | 235 → 235 | 30                 | ---                                          | ---                |
| <b>Stabilization time (s)</b>         | 0         | 10                 | 30                                           |                    |
| <b>Replicates</b>                     | 5         | 5                  | 5                                            |                    |
| <b>Total analysis time/sample (s)</b> | 378       | 398                | 438                                          |                    |

**Table S3.** ICP-MS/MS data acquisition parameters for a multi-tune method (1.0, 3.0 and 5.0 mL min<sup>-1</sup> NH<sub>3</sub>/He).

| Element                               | 1.0 mL min <sup>-1</sup> NH <sub>3</sub> /He |                   | 3.0 mL min <sup>-1</sup> NH <sub>3</sub> /He |                   | 5.0 mL min <sup>-1</sup> NH <sub>3</sub> /He |                   |
|---------------------------------------|----------------------------------------------|-------------------|----------------------------------------------|-------------------|----------------------------------------------|-------------------|
|                                       | Q1 → Q2                                      | Int.time/mass (s) | Q1 → Q2                                      | Int.time/mass (s) | Q1 → Q2                                      | Int.time/mass (s) |
| Mg                                    | ---                                          | ---               | 24→75                                        | 1                 | ---                                          | ---               |
| Sc                                    | ---                                          | ---               | 45→130                                       | 1                 | ---                                          | ---               |
| Ti                                    | ---                                          | ---               | 48→150                                       | 1                 | ---                                          | ---               |
| Fe                                    | ---                                          | ---               | 56→90                                        | 1                 | ---                                          | ---               |
| Co                                    | ---                                          | ---               | 59→59                                        | 1                 | ---                                          | ---               |
| Co                                    | ---                                          | ---               | 59→93                                        | 1                 | ---                                          | ---               |
| Cu                                    | ---                                          | ---               | 65→65                                        | 1                 | ---                                          | ---               |
| Cu                                    | ---                                          | ---               | 65→99                                        | 1                 | ---                                          | ---               |
| Zn                                    | ---                                          | ---               | 66→66                                        | 1                 | ---                                          | ---               |
| Zn                                    | ---                                          | ---               | 66→100                                       | 1                 | ---                                          | ---               |
| Ga                                    | ---                                          | ---               | 71→71                                        | 1                 | ---                                          | ---               |
| Ge                                    | ---                                          | ---               | 74→74                                        | 1                 | ---                                          | ---               |
| Ge                                    | ---                                          | ---               | 74→125                                       | 1                 | ---                                          | ---               |
| Y                                     | ---                                          | ---               | 89→89                                        | 1                 | ---                                          | ---               |
| Y                                     | ---                                          | ---               | 89→191                                       | 1                 | ---                                          | ---               |
| Rh                                    | ---                                          | ---               | 103→103                                      | 1                 | ---                                          | ---               |
| Rh                                    | ---                                          | ---               | 103→171                                      | 1                 | ---                                          | ---               |
| Ag                                    | ---                                          | ---               | 107→107                                      | 1                 | ---                                          | ---               |
| Ag                                    | ---                                          | ---               | 107→141                                      | 1                 | ---                                          | ---               |
| Cd                                    | ---                                          | ---               | 111→111                                      | 1                 | ---                                          | ---               |
| In                                    | ---                                          | ---               | 115→115                                      | 1                 | ---                                          | ---               |
| Cs                                    | ---                                          | ---               | 133→133                                      | 1                 | ---                                          | ---               |
| Ce                                    | ---                                          | ---               | 140→140                                      | 1                 | ---                                          | ---               |
| Ce                                    | ---                                          | ---               | 140→225                                      | 1                 | ---                                          | ---               |
| Tl                                    | ---                                          | ---               | 205→205                                      | 1                 | ---                                          | ---               |
| U                                     | 235→235                                      | 30                | ---                                          | ---               | 235→235                                      | 30                |
| <b>Stabilization time (s)</b>         |                                              | 0                 |                                              | 10                |                                              | 30                |
| <b>Replicates</b>                     |                                              | 5                 |                                              | 5                 |                                              | 5                 |
| <b>Total analysis time/sample (s)</b> |                                              | 539               |                                              | 569               |                                              | 629               |
